# Supplementary material
Source: publisher figshare collection journal article supplement (https://asha.figshare.com/ndownloader/files/27677328)
Supplement: Supplementary file 1 [file 27677328]

**Supplemental Material S1.** List of nonword stimuli.

1. Too-pah
2. Di-faz
3. Chay-lay
4. Bee-zee
5. Choo-noo
6. Gah-choo
7. Kot-vey
8. Cheem-vo
9. Boo-ret
10. Kee-mah
11. Poo-fle
12. Do-da
13. Ji-mul
14. Toy-tee
15. Gay-len
